# Supplementary material for: Low voltage and high ON/OFF ratio field-effect transistors based on CVD MoS2 and ultra high-k gate dielectric PZT
Source: Royal Society of Chemistry journal article supplement (doi:10.1039/c5nr01072a), 2015-01-01
Supplement: c5nr01072a1.pdf [file c5nr01072a1.pdf]

Supplementary Information:

## Low voltage and high ON/OFF ratio field-effect transistors based on CVD MoS<sub>2</sub> and ultra high-*k* PZT gate dielectric

Changjian Zhou,<sup>ab</sup> Xinsheng Wang,<sup>a</sup> Salahuddin Raju,<sup>b</sup> Ziyuan Lin,<sup>a</sup> Daniel Villaroman,<sup>c</sup>  
Baoling Huang,<sup>c</sup> Helen Lai-Wa Chan,<sup>a</sup> Mansun Chan<sup>b</sup> and Yang Chai<sup>\*a</sup>

<sup>a</sup> Department of Applied Physics, The Hong Kong Polytechnic University, Kowloon, Hong Kong.

Email:ychai@polyu.edu.hk

<sup>b</sup> Department of Electronic and Computer Engineering, The Hong Kong University of Science and Technology, Kowloon, Hong Kong

<sup>c</sup> Department of Mechanical and Aerospace Engineering, The Hong Kong University of Science and Technology, Kowloon, Hong Kong

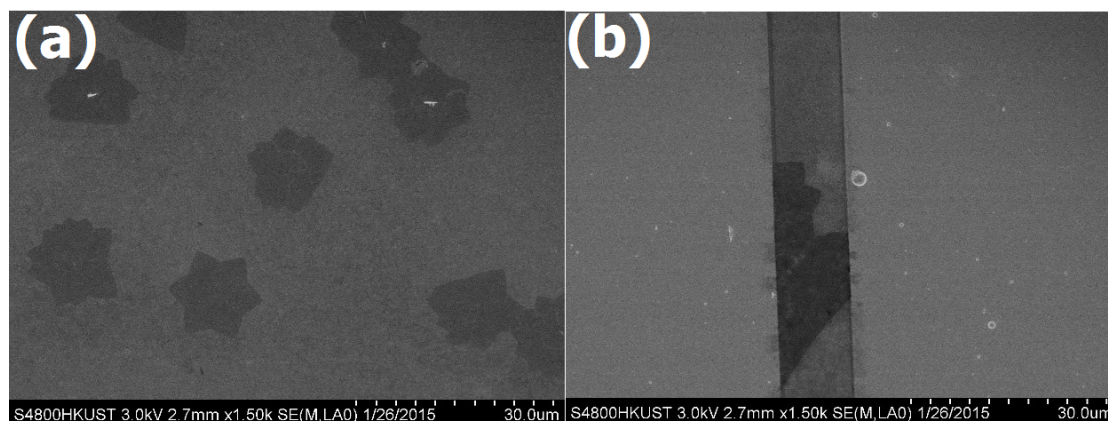

Fig. S1 SEM pictures of the transferred MoS<sub>2</sub> flakes on the PZT substrate. (a) Some triangular MoS<sub>2</sub> flakes are merged during the growth. (b) A typical device with Au/Ti electrodes on a MoS<sub>2</sub> flake.

We have fabricated PZT gated MoS<sub>2</sub> transistors with different channel dimensions and presented the transfer characteristics of several devices as following:

- Electrical characteristics of MoS<sub>2</sub> transistor with  $L = 2 \mu\text{m}$  and  $W = 20 \mu\text{m}$ . For this device,  $V_T = 0.2 \text{ V}$ ,  $SS = 104 \text{ mV/dec}$ , and  $\mu = 10.01 \text{ cm}^2/\text{V}\cdot\text{s}$ .

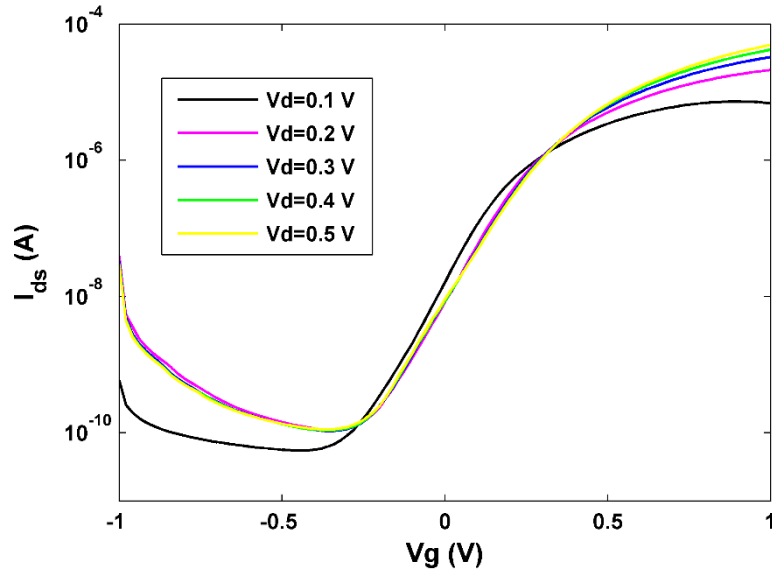

Fig. S2 Transfer characteristics of a MoS<sub>2</sub> transistor with L= 2 μm and W= 20 μm.

- b) MoS<sub>2</sub> transistor with L= 4 μm and W= 5 μm. For this device,  $V_T=0.41$  V, SS= 109 mV/dec, and  $\mu=6.19$  cm<sup>2</sup>/V·s.

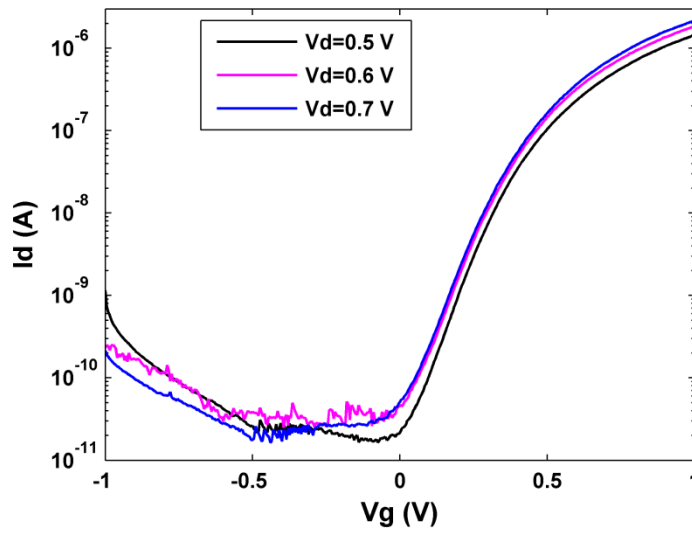

Fig. S3 Transfer characteristics of a MoS<sub>2</sub> transistor with L= 4 μm and W= 5 μm.

- c) Electrical characteristics of MoS<sub>2</sub> transistor with L= 4 μm and W= 20 μm. For this device,  $V_T=0.32$  V, SS= 99 mV/dec, and  $\mu=3.92$  cm<sup>2</sup>/V·s.

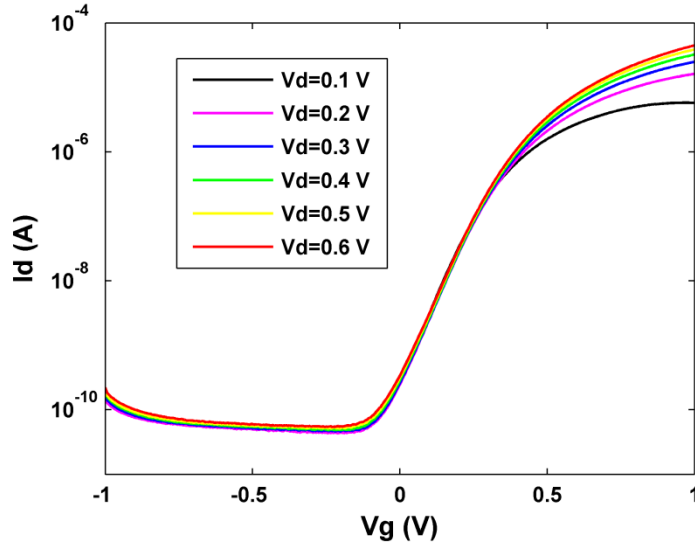

Fig. S4 Transfer characteristics of a MoS<sub>2</sub> transistor with L= 4  $\mu$ m and W= 20  $\mu$ m.

As a reference, the MoS<sub>2</sub> flakes were transferred to a SiO<sub>2</sub>/Si substrate for transistor fabrication and characterization. Fig. S5 shows the transfer characteristics of a MoS<sub>2</sub> transistor with L= 2  $\mu$ m and W= 100  $\mu$ m. Fig. S6 shows the hysteresis behavior of the same device. All the electrical characterization was conducted at 300 K in a vacuum probe station.

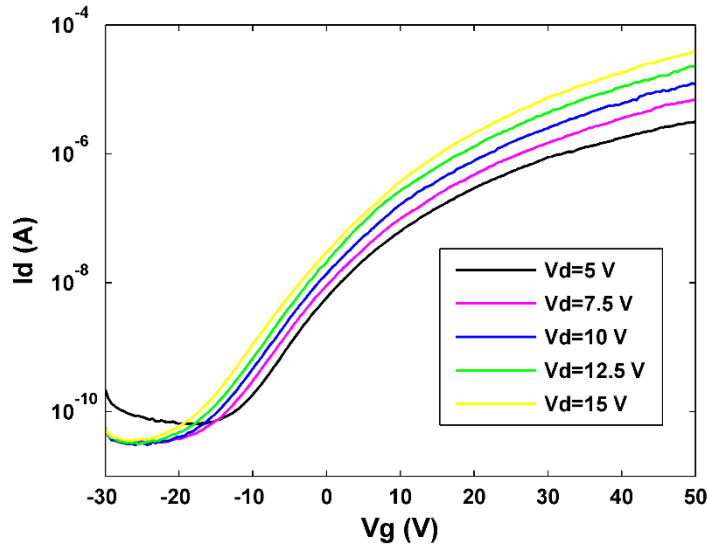

Fig. S5 Transfer characteristics of a 300 nm SiO<sub>2</sub> gated MoS<sub>2</sub> transistor with L= 2  $\mu$ m and W= 100  $\mu$ m.

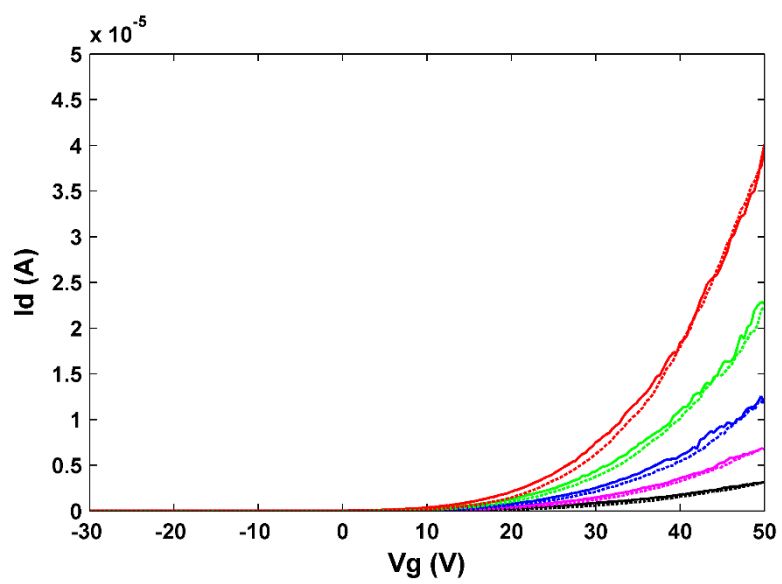

Fig. S6 Hysteresis characteristics of a 300 nm  $\text{SiO}_2$  gated  $\text{MoS}_2$  transistor with  $L=2$   $\mu\text{m}$  and  $W=100$   $\mu\text{m}$ .
